# Supplementary material for: Soluble Syndecan-1 Levels Are Associated with Survival in Platinum-Treated Bladder Cancer Patients
Source: PubMed Central journal article supplement (PMC7690724; doi:10.3390/diagnostics10110864), 2020-10-23
Supplement: diagnostics-10-00864-s001.pdf [file diagnostics-10-00864-s001.pdf]

**Table S1.** Changes of SDC1 serum levels during platinum-containing chemotherapy. OS: overall survival, PFS: progression-free survival, Prog.: progression, C: number of chemotherapy cycles, D: day of the chemotherapy cycle.

| Sample Number | OS    |        | PFS   |        | SDC1 Serum Levels During Platinum Therapy (C—cycle / D—day) |       |       |       |       |       |       |       |       |       |       |       |
|---------------|-------|--------|-------|--------|-------------------------------------------------------------|-------|-------|-------|-------|-------|-------|-------|-------|-------|-------|-------|
|               | Death | Months | Prog. | Months | C1/D1                                                       | C1/D8 | C2/D1 | C2/D8 | C3/D1 | C3/D8 | C4/D1 | C4/D8 | C5/D1 | C5/D8 | C6/D1 | C6/D8 |
| 1.            | 1     | 2      | 1     | 1      | 268                                                         | 314   | -     | -     | -     | -     | -     | -     | -     | -     | -     | -     |
| 2.            | 0     | 7      | 1     | 3      | 77                                                          | 156   | 87    | 84    | 90    | 76    | -     | -     | -     | -     | -     | -     |
| 3.            | 1     | 14     | 1     | 4      | 19                                                          | 19    | 28    | 23    | 24    | 20    | -     | -     | -     | -     | -     | -     |
| 4.            | 0     | 42     | 1     | 5      | 8                                                           | 8     | 8     | 55    | -     | 63    | 111   | 116   | -     | -     | -     | -     |
| 5.            | 1     | 9      | 1     | 7      | 110                                                         | 46    | 32    | 25    | 30    | 24    | -     | -     | 42    | 35    | 147   | 204   |
| 6.            | 1     | 9      | 1     | 8      | 67                                                          | -     | 155   | -     | 109   | 107   | -     | -     | -     | -     | -     | -     |
| 7.            | 1     | 9      | 1     | 8      | 305                                                         | 25    | 51    | 33    | 360   | 356   | 260   | 280   | 277   | 270   | -     | -     |
| 8.            | 1     | 27     | 1     | 22     | 61                                                          | -     | -     | 40    | 15    | -     | -     | -     | -     | -     | -     | -     |
| 9.            | 0     | 43     | 1     | 26     | 54                                                          | 85    | 44    | 68    | 221   | 178   | 159   | 128   | -     | -     | -     | -     |
| 10.           | 0     | 43     | 1     | 39     | 21                                                          | -     | 14    | 17    | -     | -     | -     | -     | -     | -     | -     | -     |
| 11.           | 0     | 4      | 0     | 4      | 188                                                         | 50    | -     | -     | -     | -     | -     | -     | -     | -     | -     | -     |
| 12.           | 1     | 6      | 0     | 6      | 305                                                         | 58    | -     | -     | -     | -     | -     | -     | -     | -     | -     | -     |
| 13.           | 0     | 6      | 0     | 6      | 75                                                          | 106   | -     | -     | -     | -     | -     | -     | -     | -     | -     | -     |
| 14.           | 1     | 13     | 0     | 13     | 92                                                          | 88    | 112   | 256   | -     | -     | -     | -     | -     | -     | -     | -     |
| 15.           | 0     | 18     | 0     | 18     | 109                                                         | 94    | 50    | 8     | 8     | 8     | -     | -     | -     | -     | -     | -     |
| 16.           | 1     | 22     | 0     | 22     | 61                                                          | 97    | 41    | -     | -     | -     | -     | -     | -     | -     | -     | -     |
| 17.           | 0     | 28     | 0     | 28     | 125                                                         | 130   | 95    | 65    | -     | -     | -     | -     | -     | -     | -     | -     |
| 18.           | 0     | 28     | 0     | 28     | 55                                                          | -     | 68    | 47    | -     | -     | -     | -     | -     | -     | -     | -     |
| 19.           | 0     | 33     | 0     | 33     | 58                                                          | 73    | 84    | 76    | 108   | -     | -     | -     | -     | -     | -     | -     |
| 20.           | 0     | 33     | 0     | 33     | 60                                                          | 31    | 48    | 59    | 26    | 25    | -     | -     | -     | -     | -     | -     |
| 21.           | 0     | 49     | 0     | 49     | 195                                                         | 127   | 102   | 95    | 158   | 237   | -     | -     | -     | -     | -     | -     |

  

|  |                                                         |
|--|---------------------------------------------------------|
|  | no changes compared to the baseline value (cut-off 25%) |
|  | Decreased SDC1 level after cisplatin therapy            |
|  | Increased SDC1 level after cisplatin therapy            |
|  | Baseline SDC1 >180 ng/mL                                |

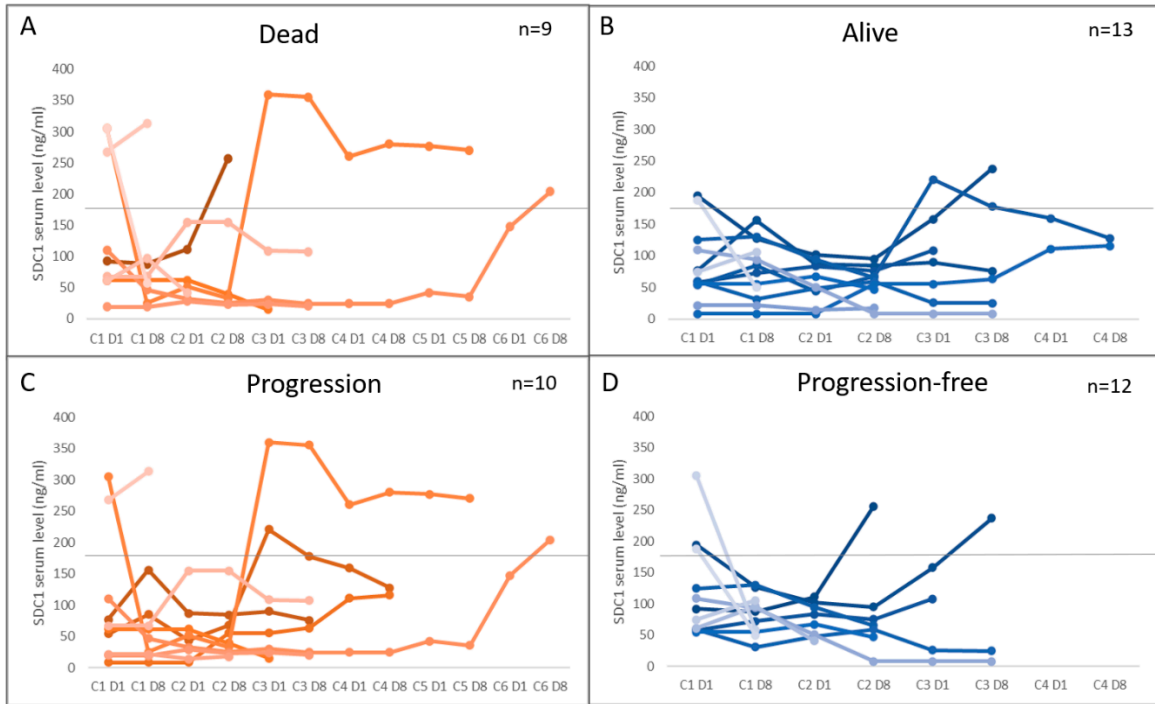

**Figure S1.** Changes of SDC1 serum levels during platinum-containing chemotherapy. Red curves represent patients who have died (A) or progressed (C) during the follow-up period. Blue curves represent SDC1 levels of patients alive (B) and without progression (D) at last follow-up. Grey horizontal lines represent the 180 ng/mL SDC1 concentration, the cut-off value of high SDC1 serum level before chemotherapy. (C): cycle, (D): day.

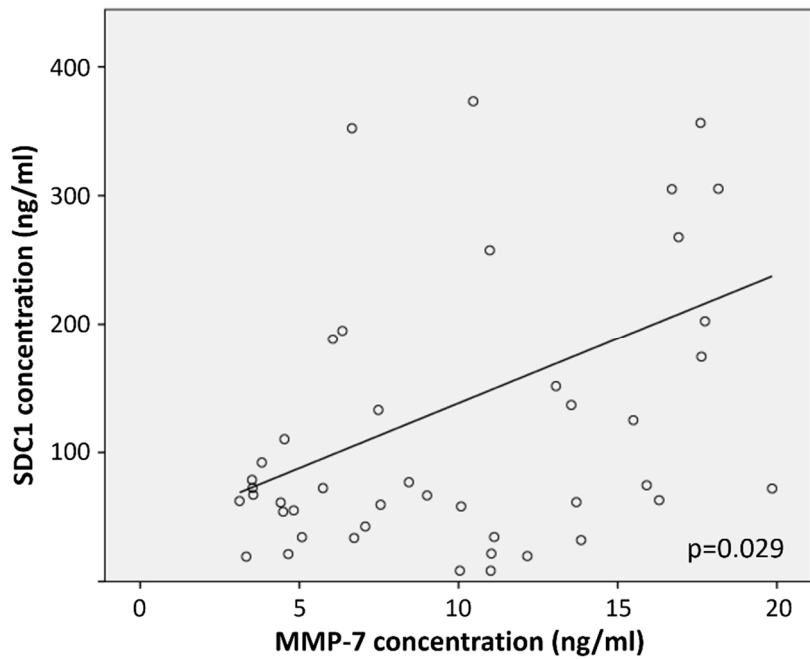

**Figure S2.** Correlation between SDC1 and MMP-7 serum concentrations.
